# Supplementary material for: Treatment of 2,4,6-tribromophenol-contaminated water using iron ion/calcium sulfite: the dual role of oxidation and coagulation
Source: Royal Society of Chemistry journal article supplement (doi:10.1039/d4ew00441h), 2024-01-01
Supplement: d4ew00441h1.pdf [file d4ew00441h1.pdf]

Electronic Supplementary Material (ESI) for Environmental Science: Water Research & Technology.  
This journal is © The Royal Society of Chemistry 2024

## Supplementary Information

for

### **Treatment of 2,4,6-tribromophenol-contaminated water using iron ion/calcium sulfite: The dual role of oxidation and coagulation**

Fan Bai,<sup>†a</sup> Ye liu,<sup>†a</sup> Yujie Cheng,<sup>a</sup> Yingqing Guo,<sup>b</sup> Zhenbin Chen,<sup>a</sup> Lisan Cao,<sup>a</sup> Zongping Wang,<sup>a</sup> and Pengchao Xie,<sup>\*a</sup>

<sup>a</sup> *School of Environmental Science and Engineering, Hubei Provincial Engineering Research Center for Water Quality Safety and Pollution Control, Hubei Key Laboratory of Multi-media Pollution Cooperative Control in Yangtze Basin, Huazhong University of Science and Technology, Wuhan, 430074, China*

<sup>b</sup> *Changzhou University Huaide College, Jingjiang 214500, China*

---

<sup>†</sup> These authors contributed to the work equally.

\* Corresponding author. E-mail: [pengchao\\_xie@hust.edu.cn](mailto:pengchao_xie@hust.edu.cn) (Pengchao Xie)

## Captions:

|                                                                                                                                                                                                                                                                                                                                                                                                                                |    |
|--------------------------------------------------------------------------------------------------------------------------------------------------------------------------------------------------------------------------------------------------------------------------------------------------------------------------------------------------------------------------------------------------------------------------------|----|
| Text S1. Identification of active substances and their contribution to pollutant degradation .....                                                                                                                                                                                                                                                                                                                             | 4  |
| Table S1. Water quality parameters .....                                                                                                                                                                                                                                                                                                                                                                                       | 5  |
| Table S2. The ratios of different elements based on the XPS results .....                                                                                                                                                                                                                                                                                                                                                      | 6  |
| Fig. S1. Removal of TBP in the Fe(III)/CaSO <sub>3</sub> system under pure water background. Conditions: [TBP] = 10 μM, [Fe(III)] = 50 μM, [CaSO <sub>3</sub> ] = 400 μM, initial pH 3.5, temperature 25 °C.....                                                                                                                                                                                                               | 7  |
| Fig. S2 Variation of S(IV) concentration in the Fe(III)/CaSO <sub>3</sub> system. Conditions: [TBP] =10 μM, [CaSO <sub>3</sub> ] = 400 μM, initial pH 3.5, temperature 25 ± 1 °C.....                                                                                                                                                                                                                                          | 8  |
| Fig. S3. Effect of active substances in the degradation of TBP by the Fe(III)/CaSO <sub>3</sub> system: (a) The EPR spectra at different reaction time intervals, (b) the role of EtOH and TBA on the degradation of TBP in the Fe(III)/CaSO <sub>3</sub> system. Conditions: [DMPO] = 50 mM, [TBP] = 10 μM, [Fe(III)] = 50 μM, [CaSO <sub>3</sub> ] = 400 μM, [TBA] = [EtOH] = 10 mM, initial pH 3.5, temperature 25 °C. .... | 9  |
| Fig. S4. Removal of fluorescent organic matter by the Fe(III) coagulation alone and the combined oxidation and coagulation process of Fe(III)/CaSO <sub>3</sub> : (a-c) lake water; (d-f) secondary sedimentation tank effluent. Conditions: [TBP] = 10 μM, [Fe(III)] <sub>LW</sub> = 50 μM, [Fe(III)] <sub>SSTE</sub> = 100 μM, [CaSO <sub>3</sub> ] = 400 μM, initial pH 3.5, temperature 25 °C.....                         | 10 |
| Fig. S5. XPS spectra of O 1s in flocs after coagulation with Fe(III) alone and Fe(III)/CaSO <sub>3</sub> : (a-b) lake water; (c-d) secondary sedimentation tank effluent. Conditions: [TBP] = 10 μM, [Fe(III)] <sub>LW</sub> = 50 μM, [Fe(III)] <sub>SSTE</sub> = 100 μM, [CaSO <sub>3</sub> ] = 400 μM, initial pH 3.5, temperature 25 °C. ....                                                                               | 11 |
| Fig. S6. Effects of Fe(III) concentration on fluorescent organic matter removal in the Fe(III)/CaSO <sub>3</sub> system: (a) lake water; (b) secondary sedimentation tank effluent. Conditions: [TBP] = 10 μM, [CaSO <sub>3</sub> ] = 400 μM, initial pH 3.5, temperature 25 °C.....                                                                                                                                           | 12 |
| Fig. S7. Effects of Fe(III) concentration on zeta potential values in the Fe(III)/CaSO <sub>3</sub> system: (a) lake water; (b) secondary sedimentation tank effluent. Conditions: [TBP] = 10 μM, [CaSO <sub>3</sub> ] = 400 μM, initial pH 3.5, temperature 25 °C.....                                                                                                                                                        | 13 |
| Fig. S8. Effects of CaSO <sub>3</sub> dosage on fluorescent organic matter removal in the Fe(III)/CaSO <sub>3</sub> system: (a) lake water; (b) secondary sedimentation tank effluent. Conditions: [TBP] = 10 μM, [CaSO <sub>3</sub> ] = 400 μM, initial pH 3.5, temperature 25 °C.....                                                                                                                                        | 14 |

Fig. S9. Effects of initial pH on turbidity, DOC, TBP and UV<sub>254</sub> removal (a, c) and fluorescent organic matter removal (b, d) in the Fe(III)/CaSO<sub>3</sub> system: (a, b) lake water; (c, d) secondary sedimentation tank effluent. Conditions: [TBP] = 10 μM, [CaSO<sub>3</sub>] = 400 μM, initial pH 3.5, temperature 25 °C.....15

**Text S1.** Identification of active substances and their contribution to pollutant degradation

5,5-Dimethyl-1-pyrroline N-oxide (DMPO) was employed as a spin trap to capture free radicals potentially generated in the system,<sup>1</sup> and the types of free radicals in the Fe(III)/CaSO<sub>3</sub> system were detected by an electron paramagnetic resonance spectrometer (EPR). The results are shown in Fig. S2a.

At 1, 3, and 8 minutes, corresponding signals of DMPO-SO<sub>3</sub><sup>•-</sup> were observed in the solution. Along with the progress of the reaction, the spectral intensity of DMPO-SO<sub>3</sub><sup>•-</sup> initially increased and then decreased, indicating the generation of SO<sub>3</sub><sup>•-</sup> in the solution. Given that SO<sub>3</sub><sup>•-</sup> has been confirmed to generate highly oxidative free radicals such as SO<sub>4</sub><sup>•-</sup>, HO<sup>•</sup>, and SO<sub>5</sub><sup>•-</sup> through a series of reactions in the presence of oxygen,<sup>2-4</sup> it is speculated that the degradation of TBP in the Fe(III)/CaSO<sub>3</sub> system is primarily accomplished through the action of strong oxidative free radicals within the system.

To further elucidate the contributions of each radical to TBP degradation, the effects of ethanol (EtOH) and tert-butanol (TBA) on the efficiency of TBP degradation in the Fe(III)/CaSO<sub>3</sub> system were investigated. By comparing the reaction rates of TBP and radical scavengers with HO<sup>•</sup>, SO<sub>4</sub><sup>•-</sup>, and SO<sub>5</sub><sup>•-</sup>, it was found that 10 mM TBA (1000 times the concentration of TBP) was sufficient to scavenge most of the HO<sup>•</sup> while consuming only a small amount of SO<sub>4</sub><sup>•-</sup> and SO<sub>5</sub><sup>•-</sup>.<sup>5</sup> On the other hand, 10 mM EtOH can scavenge most of the HO<sup>•</sup> and SO<sub>4</sub><sup>•-</sup>, while consuming only a small amount of SO<sub>5</sub><sup>•-</sup>.<sup>6</sup> As shown in Fig. S2b, when no scavenger was added to the system, the degradation rate of TBP was 86.1%; when 10 mM TBA and EtOH were added, the degradation rate of TBP decreased to 73.9% and 36.9%, respectively. These results indicated that both EtOH and TBA could inhibit TBP degradation to a certain extent. In the Fe(III)/CaSO<sub>3</sub> system, SO<sub>4</sub><sup>•-</sup>, SO<sub>5</sub><sup>•-</sup> and HO<sup>•</sup> might all participate in the oxidative degradation of TBP, while SO<sub>4</sub><sup>•-</sup> and SO<sub>5</sub><sup>•-</sup> played the dominant role in TBP degradation in this system.

**Table S1.** Water quality parameters

| Parameter         | Unit             | Lake water | Secondary sedimentation tank effluent |
|-------------------|------------------|------------|---------------------------------------|
| Turbidity         | NTU              | 44.2       | 1.36                                  |
| pH                | –                | 8.03       | 7.73                                  |
| UV <sub>254</sub> | cm <sup>-1</sup> | 0.072      | 0.085                                 |
| DOC               | mg/L             | 5.78       | 6.24                                  |

**Table S2.** The ratios of different elements based on the XPS results

| Type  | Characteristic peaks | LW (%)                    |         | SSTE (%)                  |         |
|-------|----------------------|---------------------------|---------|---------------------------|---------|
|       |                      | Fe(III)/CaSO <sub>3</sub> | Fe(III) | Fe(III)/CaSO <sub>3</sub> | Fe(III) |
| Fe 2p | Fe(II)               | 27.4                      | 17.6    | 28.1                      | 19.5    |
|       |                      | 11.8                      | 7.8     | 12.4                      | 8.5     |
|       | Fe(III)              | 42.2                      | 51.8    | 41.3                      | 50.0    |
|       |                      | 18.6                      | 22.8    | 18.2                      | 22.0    |
| O 1s  | Fe-O                 | 7.2                       | 9.7     | 10.0                      | 7.8     |
|       | Fe-OH                | 36.0                      | 21.0    | 15.3                      | 40.8    |
|       | C=O                  | 28.1                      | 27.3    | 58.8                      | 36.7    |
|       | C-O                  | 28.8                      | 42.0    | 15.9                      | 14.7    |

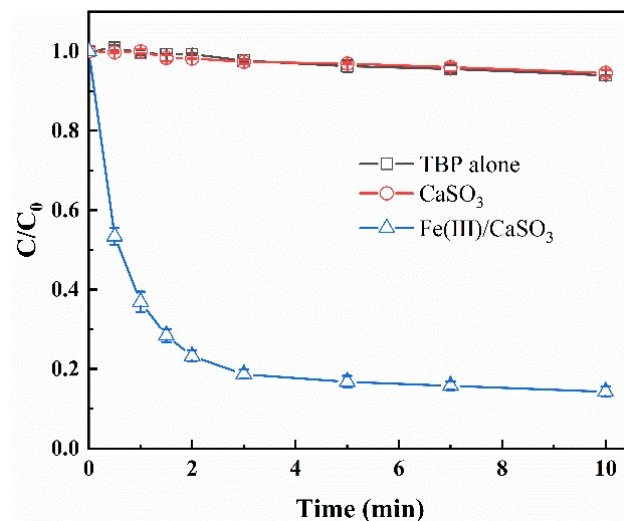

**Fig. S1** Removal of TBP in the Fe(III)/CaSO<sub>3</sub> system under pure water background. Conditions: [TBP] = 10 μM, [Fe(III)] = 50 μM, [CaSO<sub>3</sub>] = 400 μM, initial pH 3.5, temperature 25 °C.

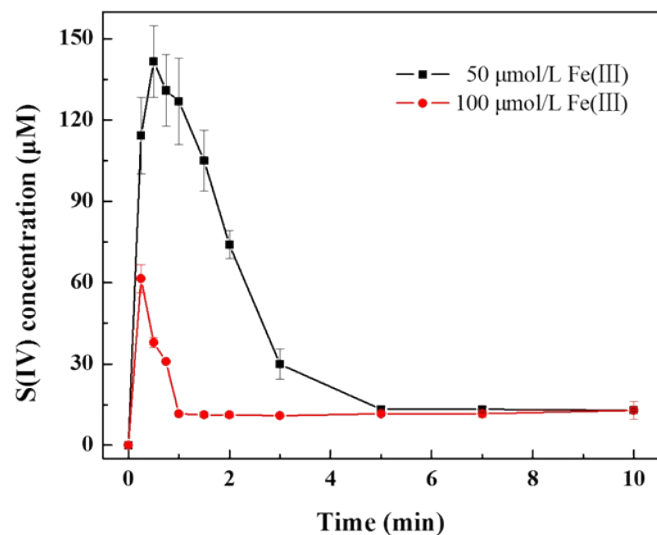

**Fig. S2** Variation of S(IV) concentration in the Fe(III)/CaSO<sub>3</sub> system. Conditions: [TBP] = 10 µM, [CaSO<sub>3</sub>] = 400 µM, initial pH 3.5, temperature 25 ± 1 °C.



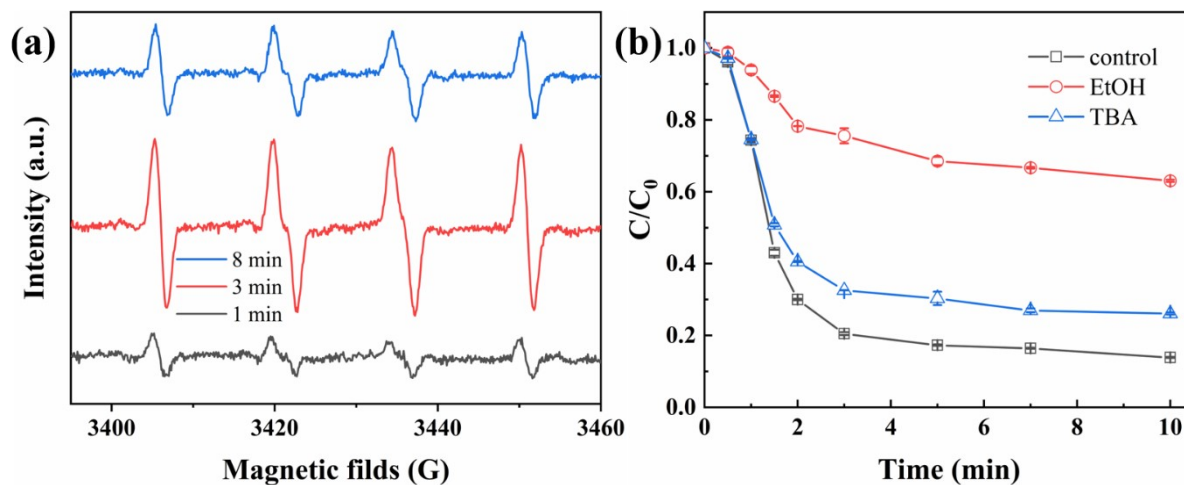

**Fig. S3.** Effect of active substances in the degradation of TBP by the Fe(III)/CaSO<sub>3</sub> system: (a) The EPR spectra at different reaction time intervals, (b) the role of EtOH and TBA on the degradation of TBP in the Fe(III)/CaSO<sub>3</sub> system. Conditions: [DMPO] = 50 mM, [TBP] = 10 μM, [Fe(III)] = 50 μM, [CaSO<sub>3</sub>] = 400 μM, [TBA] = [EtOH] = 10 mM, initial pH 3.5, temperature 25 °C.

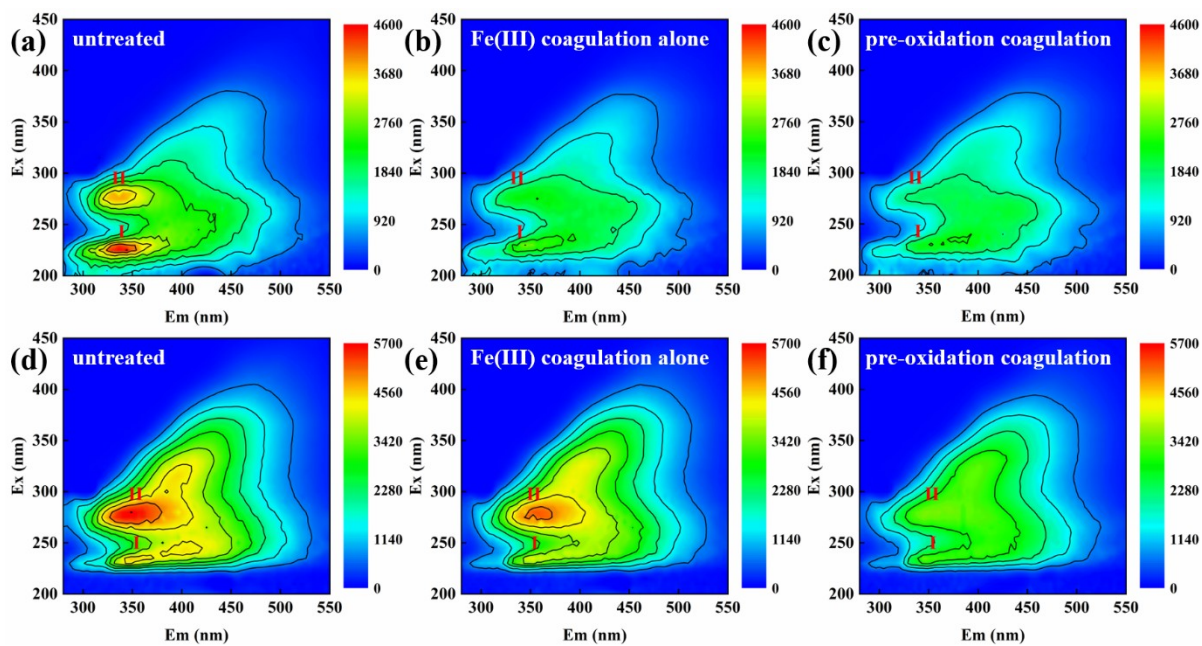

**Fig. S4.** Removal of fluorescent organic matter by the Fe(III) coagulation alone and the combined oxidation and coagulation process of Fe(III)/CaSO<sub>3</sub>: (a-c) lake water; (d-f) secondary sedimentation tank effluent. Conditions: [TBP] = 10 μM, [Fe(III)]<sub>LW</sub> = 50 μM, [Fe(III)]<sub>SSTE</sub> = 100 μM, [CaSO<sub>3</sub>] = 400 μM, initial pH 3.5, temperature 25 °C.

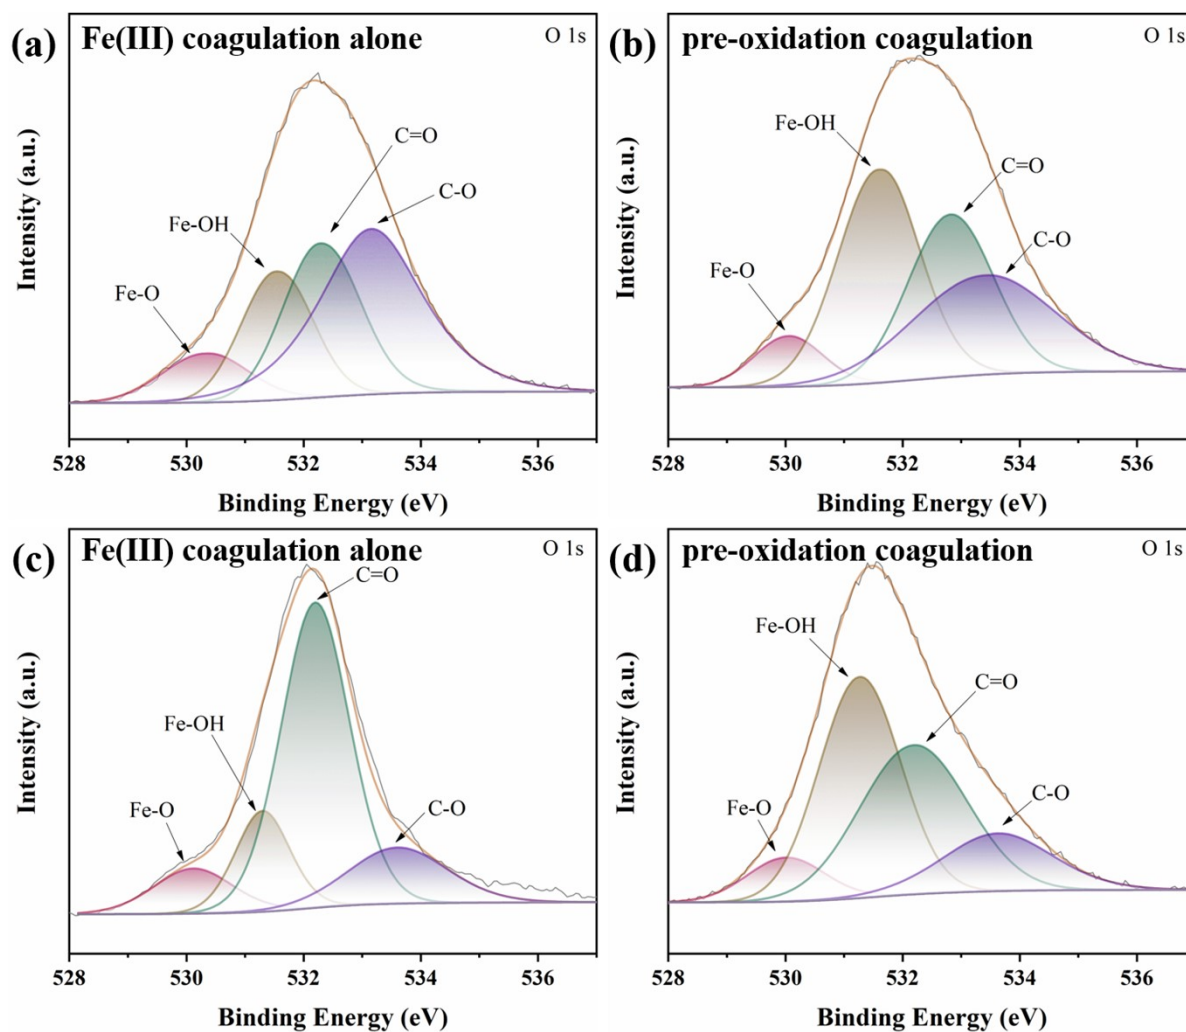

**Fig. S5.** XPS spectra of O 1s in flocs after coagulation with Fe(III) alone and Fe(III)/CaSO<sub>3</sub>: (a-b) lake water; (c-d) secondary sedimentation tank effluent. Conditions: [TBP] = 10 μM, [Fe(III)]<sub>LW</sub> = 50 μM, [Fe(III)]<sub>SSTE</sub> = 100 μM, [CaSO<sub>3</sub>] = 400 μM, initial pH 3.5, temperature 25 °C.

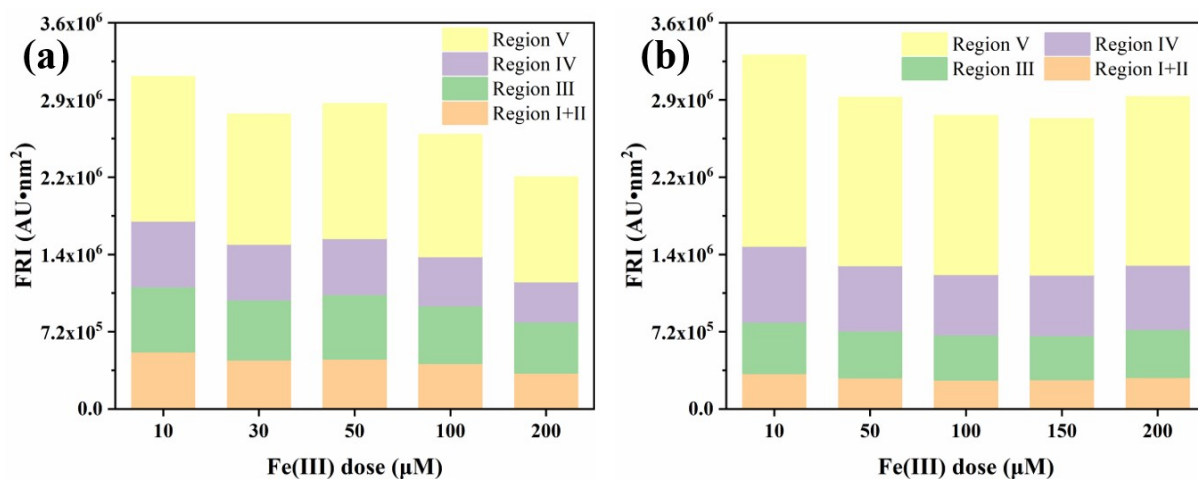

**Fig. S6.** Effects of Fe(III) concentration on fluorescent organic matter removal in the Fe(III)/CaSO<sub>3</sub> system: (a) lake water; (b) secondary sedimentation tank effluent. Conditions: [TBP] = 10 µM, [CaSO<sub>3</sub>] = 400 µM, initial pH 3.5, temperature 25 °C.

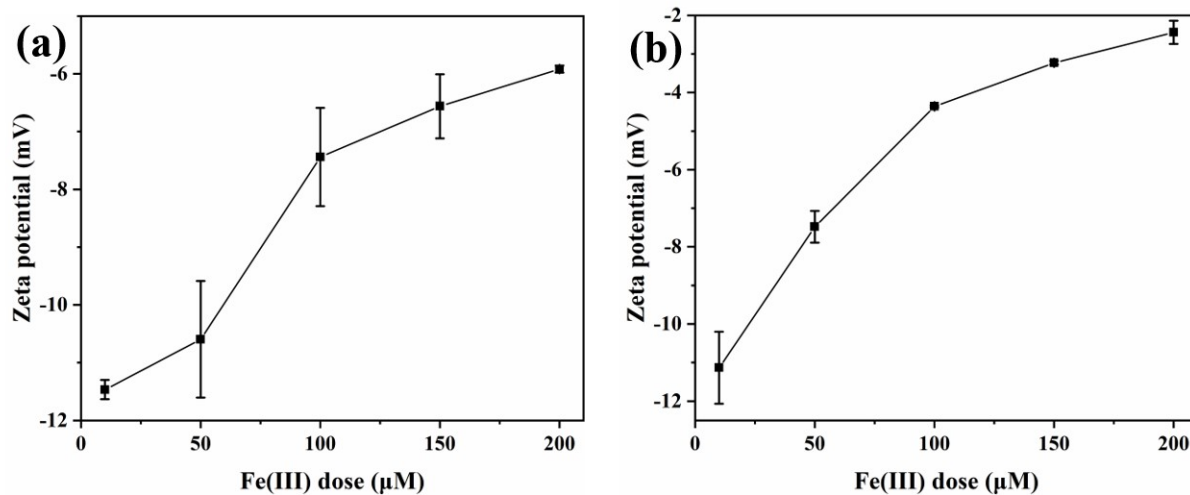

**Fig. S7.** Effects of Fe(III) concentration on zeta potential values in the Fe(III)/CaSO<sub>3</sub> system: (a) lake water; (b) secondary sedimentation tank effluent. Conditions: [TBP] = 10  $\mu\text{M}$ , [CaSO<sub>3</sub>] = 400  $\mu\text{M}$ , initial pH 3.5, temperature 25 °C.

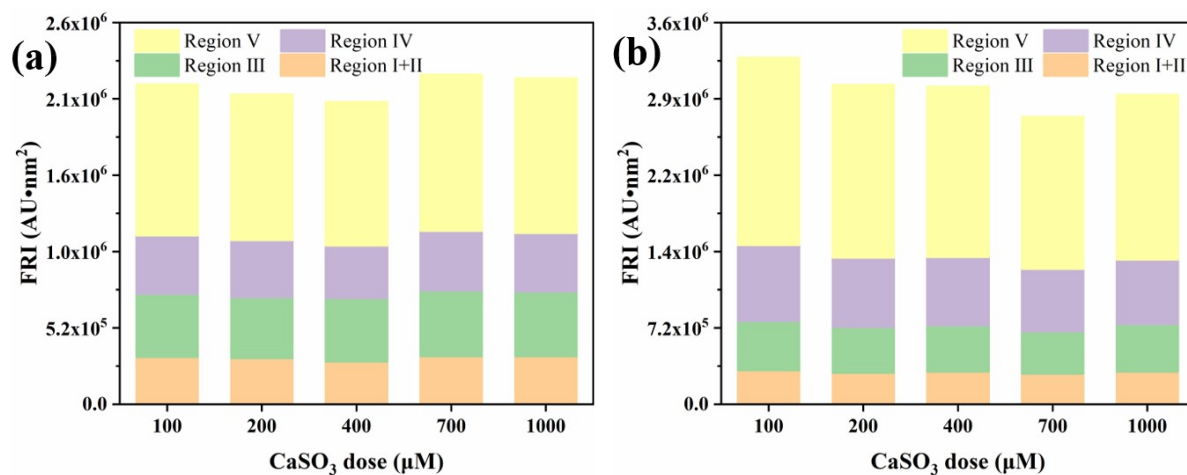

**Fig. S8.** Effects of CaSO<sub>3</sub> dosage on fluorescent organic matter removal in the Fe(III)/CaSO<sub>3</sub> system: (a) lake water; (b) secondary sedimentation tank effluent. Conditions: [TBP] = 10 μM, [CaSO<sub>3</sub>] = 400 μM, initial pH 3.5, temperature 25 °C.

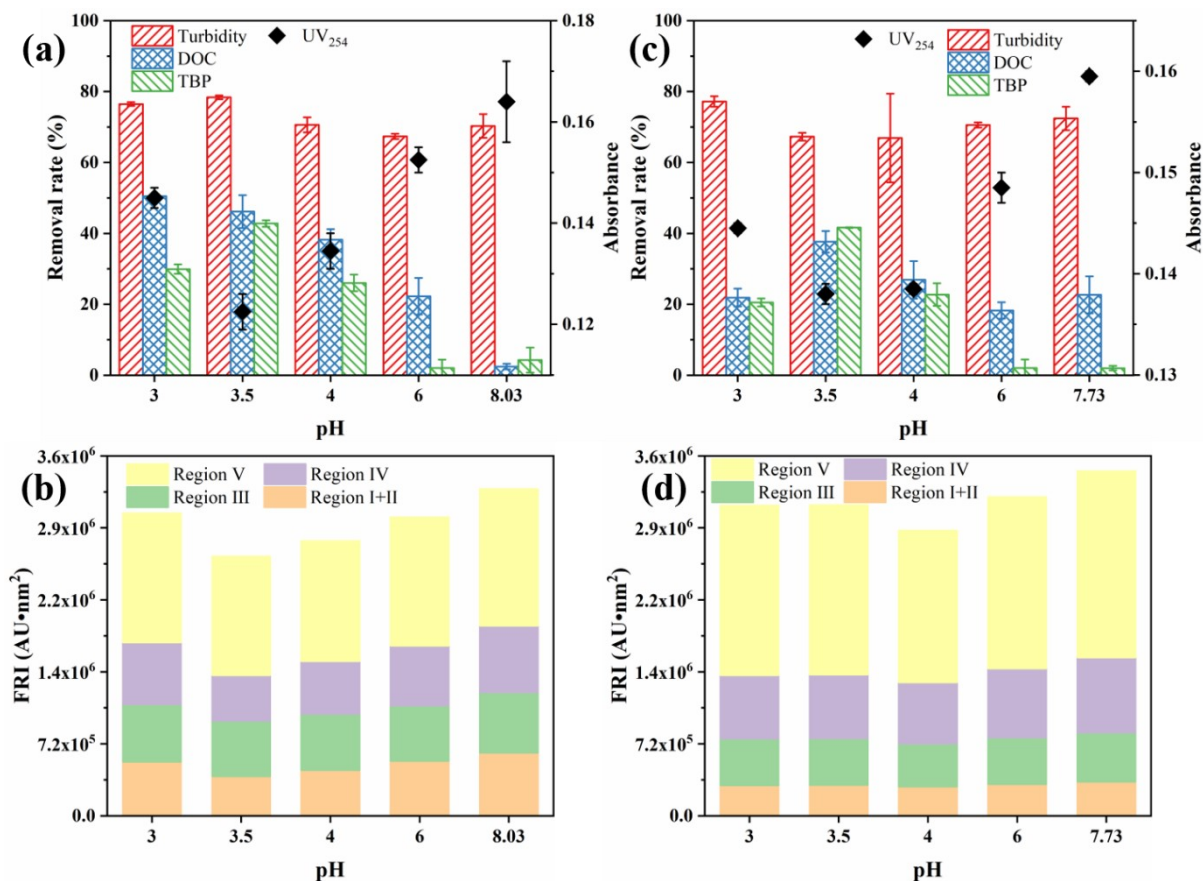

**Fig. S9.** Effects of initial pH on turbidity, DOC, TBP and UV<sub>254</sub> removal (a, c) and fluorescent organic matter removal (b, d) in the Fe(III)/CaSO<sub>3</sub> system: (a, b) lake water; (c, d) secondary sedimentation tank effluent. Conditions: [TBP] = 10 μM, [CaSO<sub>3</sub>] = 400 μM, initial pH 3.5, temperature 25 °C.

## References

1. P. L. Zamora and F. A. Villamena, Theoretical and Experimental Studies of the Spin Trapping of Inorganic Radicals by 5,5-Dimethyl-1-pyrroline N-Oxide (DMPO). 3. Sulfur Dioxide, Sulfite, and Sulfate Radical Anions, *Journal of Physical Chemistry A*, 2012, **116**, 7210-7218.
2. L. Zhang, L. Chen, M. Xiao, L. Zhang, F. Wu and L. Ge, Enhanced Decolorization of Orange II Solutions by the Fe(II)-Sulfite System under Xenon Lamp Irradiation, *Industrial & Engineering Chemistry Research*, 2013, **52**, 10089-10094.
3. Z. Wang, F. Bai, L. Cao, S. Yue, J. Wang, S. Wang, J. Ma and P. Xie, Activation of sulfite by ferric ion for the degradation of 2,4,6-tribromophenol with the addition of sulfite in batches, *Chinese Chemical Letters*, 2022, **33**, 4766-4770.
4. D. Zhou, L. Chen, C. Zhang, Y. Yu, L. Zhang and F. Wu, A novel photochemical system of ferrous sulfite complex: Kinetics and mechanisms of rapid decolorization of Acid Orange 7 in aqueous solutions, *Water Research*, 2014, **57**, 87-95.
5. E. Hayon, A. Treinin and J. Wilf, Electronic spectra, photochemistry, and autoxidation mechanism of the sulfite-bisulfite-pyrosulfite systems.  $\text{SO}_2^-$ ,  $\text{SO}_3^-$ ,  $\text{SO}_4^-$ , and  $\text{SO}_5^-$  radicals, *Journal of the American Chemical Society*, 1972, **94**, 47-57.
6. L. Dogliotti and E. Hayon, Flash photolysis of per[oxydi]sulfate ions in aqueous solutions. The sulfate and ozonide radical anions, *The Journal of Physical Chemistry*, 1967, **71**, 2511-2516.
